# Supplementary material
Source: PubMed Central journal article supplement (PMC2702456)
Supplement: supp_212_14_2224__4.pdf [file supp_212_14_2224__4.pdf]

TMP-2a GYNGYGYGNIYGYGNIY-----DYGNIYGYGYNGYGNRRTNIFVNKGSYGYNNAGYG  
TMP-2b  
TMP-2c GYNGYGYGNIYGYGNIYDYGNIYGYGNRYGYGYNGYGNRRTNIFVNKGSYGYNNAGYG  
TMP-2d  
TMP-2e -----IYGYGNRYGYGYNG-----  
TMP-2f -----KIVINRGNNGYGYNSNGYGNDRTHIIVNKGSYGYNNNDGYG  
TMP-2g  
TMP-2h

TMP-2a HG YGYGYNSYGNKTTKIVINRGNNGYGYNSNGYGNDRTHIIVNKGSYGYNNNDGYGNGY G  
TMP-2b  
TMP-2c HG YGYGYNSYGNKTTKIVINRGNNGYGYNSNGYGNDRTHIIVNKGSYGYNYDGYGNGY G  
TMP-2d  
TMP-2e -----YGNKTTKIVINRGNNGYGYNSNGYGNDRTHIIVNKGSYGYNNNDGYGNGY G  
TMP-2f HG YGYGYNSYGNKTTKIVINRGNNGYGYNSNGYGNDRTHIIVNKGSYGYNNNDGYGNGY G  
TMP-2g  
TMP-2h

TMP-2a YGYNSYGNKTKIIVNKGSYGY...  
TMP-2b  
TMP-2c YGYNSYGNKTKIIVNKGSYGY...  
TMP-2d  
TMP-2e YGYNSYGNKTKIIVNKGSYGY...  
TMP-2f YGYNSYGNKTKIIVNKGSYGYHNDGYGNGYGYGNRYGYGNIYVYGNNNGYGYGY...  
TMP-2g  
TMP-2h

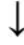

TMP-2a QHCLVLLL FALANGS GYGYGKTTNVVVNKGSYGYNNGGYGNGYGY-----GNI  
TMP-2b MVQLTQHCLVLLL FALANGS GYGYGKTTNVVVNKGSYGYNNGGYGNGYGY-----GNI  
TMP-2c QHCLVLLL FALANGS GYGYGKTTNVVVNKGSYGYNNGGYGNGYGYGHIYGYGNI  
TMP-2d QHCLVLLL FALANGS GYGYGKTTNVVVNKGSYGYNNGGYGNGYGY-----GNI  
TMP-2e QHCLVLLL FALANGS GYGYGKTTNLVVNKGSYGYNNGGYGNGYGY-----GNI  
TMP-2f QHCLVLLL FALANGS GYGYGKTTNVVVNKGSYGYNNGGYGNGYGY-----GNI  
TMP-2g QHCLVLLL FALANGS GYGYGKTTNVVVNKGSYGYNNGGYGNGYGY-----GNI  
TMP-2h QHCLVLLL FALANGS SYGYGKTTNVVVNKGSYGYNNGGYGNGYGY-----GNI  
\*\*\*\*\*

TMP-2a YDYGYNGYGNKTNIIIVNKGSRYGYNNGGYGNGYGYGNIYGYGNIYGYGNIYGYGNRYGY  
TMP-2b YGYGYNGYGNKTNIIIVNKGSRYGYNNGGYGNGYGYGNIY-----GY  
TMP-2c YGYGYNGYGNKTNIIIVNKGSRYGYNNGGYGNGYGYGNIYGYG-----NIYGYGNRYGY  
TMP-2d YDYGYNGYGNKTNIIIVNKGSRYGYNNGGYGSGYGYGNIYGYG-----NIYDYGNIYGY  
TMP-2e YDYGYNGYGNKTNIIIVNKGSRYGYNNGGYGNGYGYGNIYGYGNIYGYGNIYGYGNRYGY  
TMP-2f YDYGYNGYGNKTNIIIVNKGSRYGYNNGGYGNGYGYGNIYGYGNIYGYGNIYGYGNRYGY  
TMP-2g YDY-----GNIYDYG-----NIYGYGNRYGY  
TMP-2h YGYGYNGYGNKTNIIIVNKGSRYGYNNGGYGNGYGYGNIYGYG-----NIYGYGNRYGY  
\* \* \* \* \*

TMP-2a GYNGYGNKTNIFVNKGNNGYGYGNI-----YGYGNINGIGN----IYGYGNRYGYGYNG  
TMP-2b GYNGYGNKTNIIIVNKGSRYGYNNGGYGNGYGYN-GIY-----  
TMP-2c GYGYGNKTNIFVNKGNNGYGYGNI-----YGI GN----IYGYGNRYGYGYNG  
TMP-2d GYNGYGNRRTNIFVNKGSYGYNNAGYGHGYGYGNSYGNKTTKIVINRGNNGYGYNSNG  
TMP-2e GYGYGNKTNIFVNKGNNGYGYGNI-----YGYG-NINGIGN----IYGYGNRYGYGYNG  
TMP-2f GYNGYGNKTNIFVNKGNNGYGYGNI-----YGYG-NINGIGN----IYGYGNRYGYGYNG  
TMP-2g GYNGYGNRRTNIFVNKGSYGYNNAGYGHGYGYGNSYGNGITTKIVINRGNNGYGYNSNG  
TMP-2h GYNGYGNKTNIFVNKGNNGYGYGNI-----YGYG-NIYGI GN----IYGYGNRYGYGYNG  
\*\* \*\*\*\*\* \*\* \* \*\*

TMP-2a YGNKTNIFVNKGNNGYGYGNIYGYGNRYGFGNIYGYGNIYGYGNRYGYGYNGYGNKQTN  
TMP-2b -----GYGNTYGYG...  
TMP-2c YGNKTNIFVNKGNNGYGYGNIYGYGNIYGYGNI-----YGYGNRYGYGYNGYGNKTN  
TMP-2d YGNDRTHIIVNKGSYGYNN-----DGYGNGYGYGYNSYGNKTK  
TMP-2e YGNKTNIFVNKGNNGYGYGNIYGYGNRYGFGNIYGYGNIYGYGNRYGYGYNGYGNKTN  
TMP-2f YGNRRTNIFVNKGSYGYNN-GGYGNGYGYGNIYGYGNI-YDYGNIYGYGYNGYGNRRTN  
TMP-2g YGNDRTHIIVNKGSYGYNY-----DGYGNGYGYGYNSYGNKTK  
TMP-2h YGNKTNIFVNKGNNGYGYGNIYGYGNIYGYGNI-----YGYGNRYGYGYNGYGNKTN  
\*\*\* \*\*

TMP-2a IFVNKGNNGYGYGNIYGYGNVYGI GNIYGYGNRYGYGYNGYGNRRTNIFVNKGSYGYNNG  
TMP-2b  
TMP-2c IFVNKGNNGYGYGNIYGYGN-----RYGYGYNGYGNRRTNIFVNKGSYGYNND  
TMP-2d IIVNKGSYGY...  
TMP-2e IFVNKGNNGYDYGNIYGYGN-----VYG-----IGN-----  
TMP-2f IFVNKGSYGYNNA-GYGH-----GYGYNSYGNKTT-----  
TMP-2g IIVNKGSYGY...  
TMP-2h IFVNKGNNGYGYGNIYGYGN-----IYG...
